# Supplementary material for: Genomic signatures reveal DNA damage response deficiency in colorectal cancer brain metastases
Source: PubMed Central journal article supplement (PMC6639368; doi:10.1038/s41467-019-10987-3), 2019-07-18
Supplement: 41467_2019_10987_MOESM1_ESM.pdf [file 41467_2019_10987_MOESM1_ESM.pdf]

**Supplementary information**

**Genomic Signatures Reveal DNA Damage Response Deficiency in Brain Metastases of Colorectal Cancer**

**Sun et al.**

Supplementary Figure 1. Major mutational signatures in our patients and TCGA CRC patients. TCGA patients were included after matching for age, sex and stage at diagnosis using nearest matching methods. The results were similar with the proportions we provided in Figure 1B.

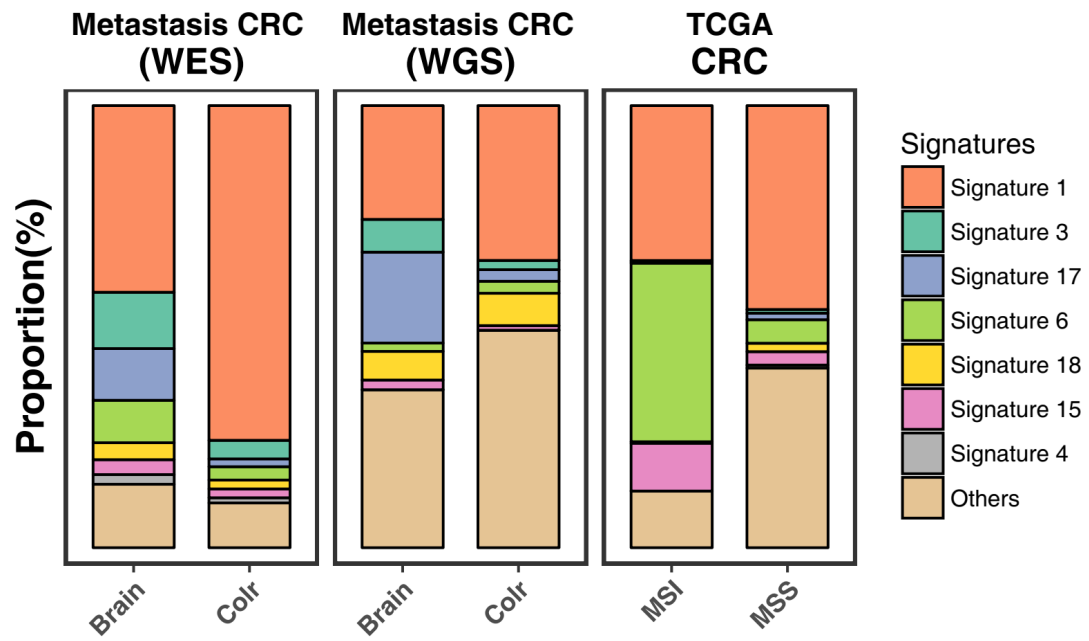

Supplementary Figure 2. The detailed proportion of 4 mutational signatures in all BMs and primary tissues.

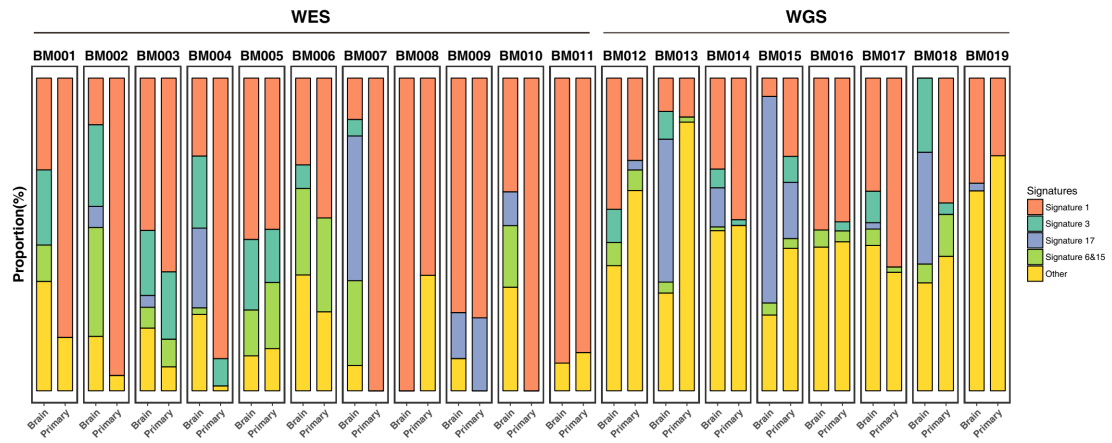

Supplementary Figure 3. GSEA analysis also suggested that MMR and HR gene sets were significantly negatively enriched in brain metastasis tissues. The bottom portion of the figure plots the enrichment scores (ES) for each gene, whereas the top portion of the plot shows the value of the ranking metric moving down the list of ranked genes. (A) Mismatch repair related genes. (B) Homologous recombination related genes.

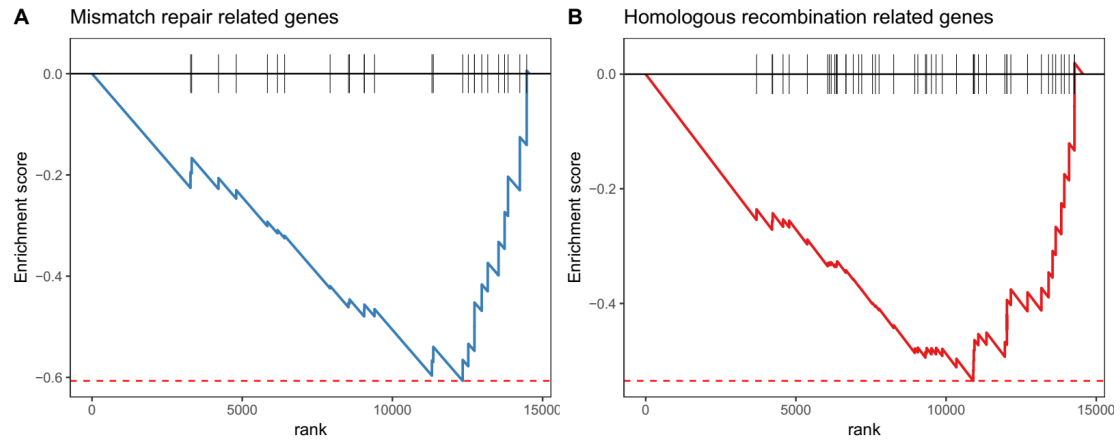

Supplementary Figure 4. Correlation between the proportion of COSMIC Signature 17 and mutation burden. We estimated the proportion of each mutational signature R package deconstructSigs according to the mutation pattern matrix reported by COSMIC. The mutation burden was defined as the number of somatic mutations per megabase (/MB) of genome examined.

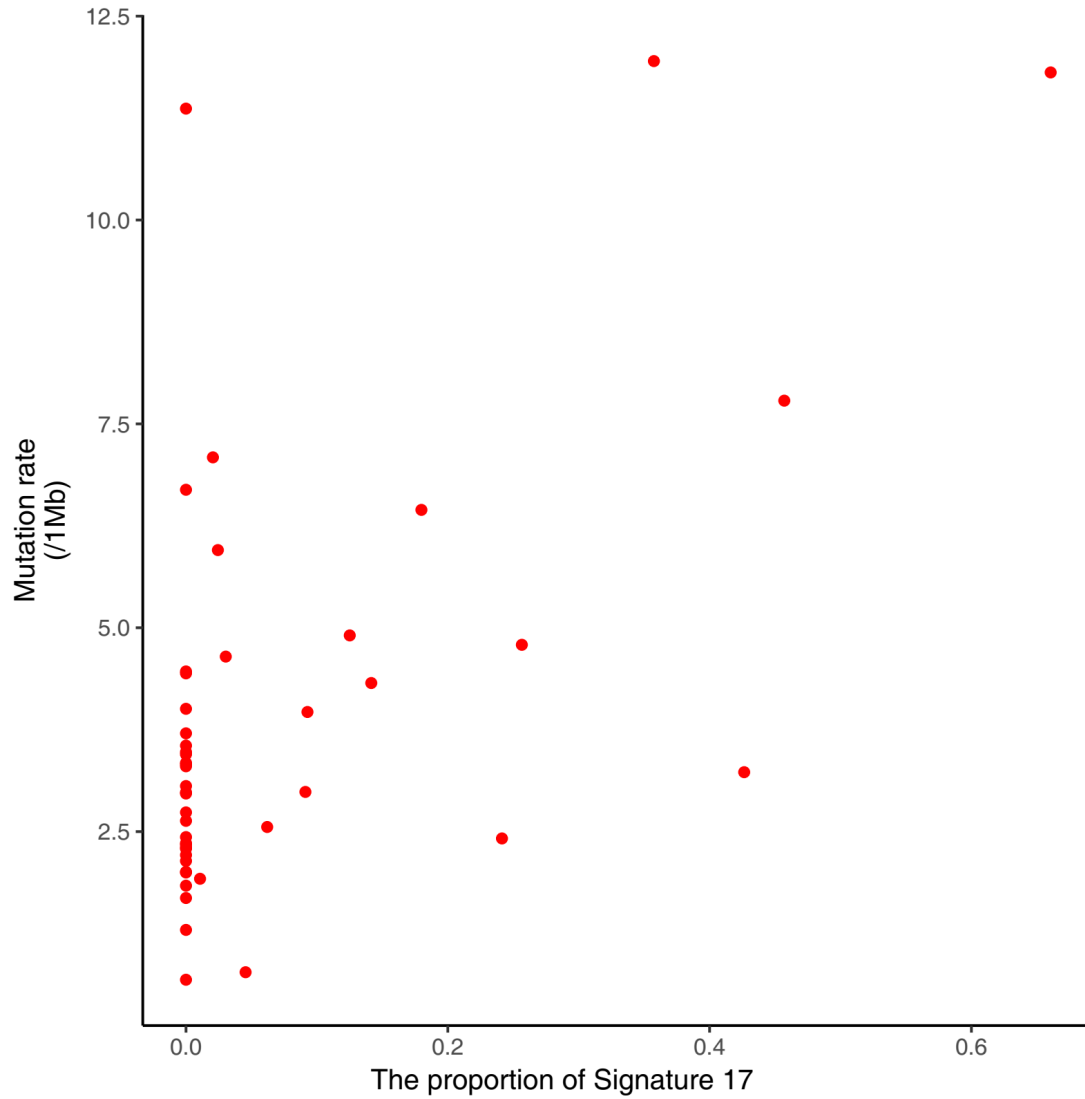

Supplementary Figure 5. No significant difference was found between the COSMIC signature (signature 1, 3, 17 and 6&15) proportion of liver metastasis and primary colorectal tissues. Mutation calling and mutational signature extraction followed the same pipeline in BM “trios”.

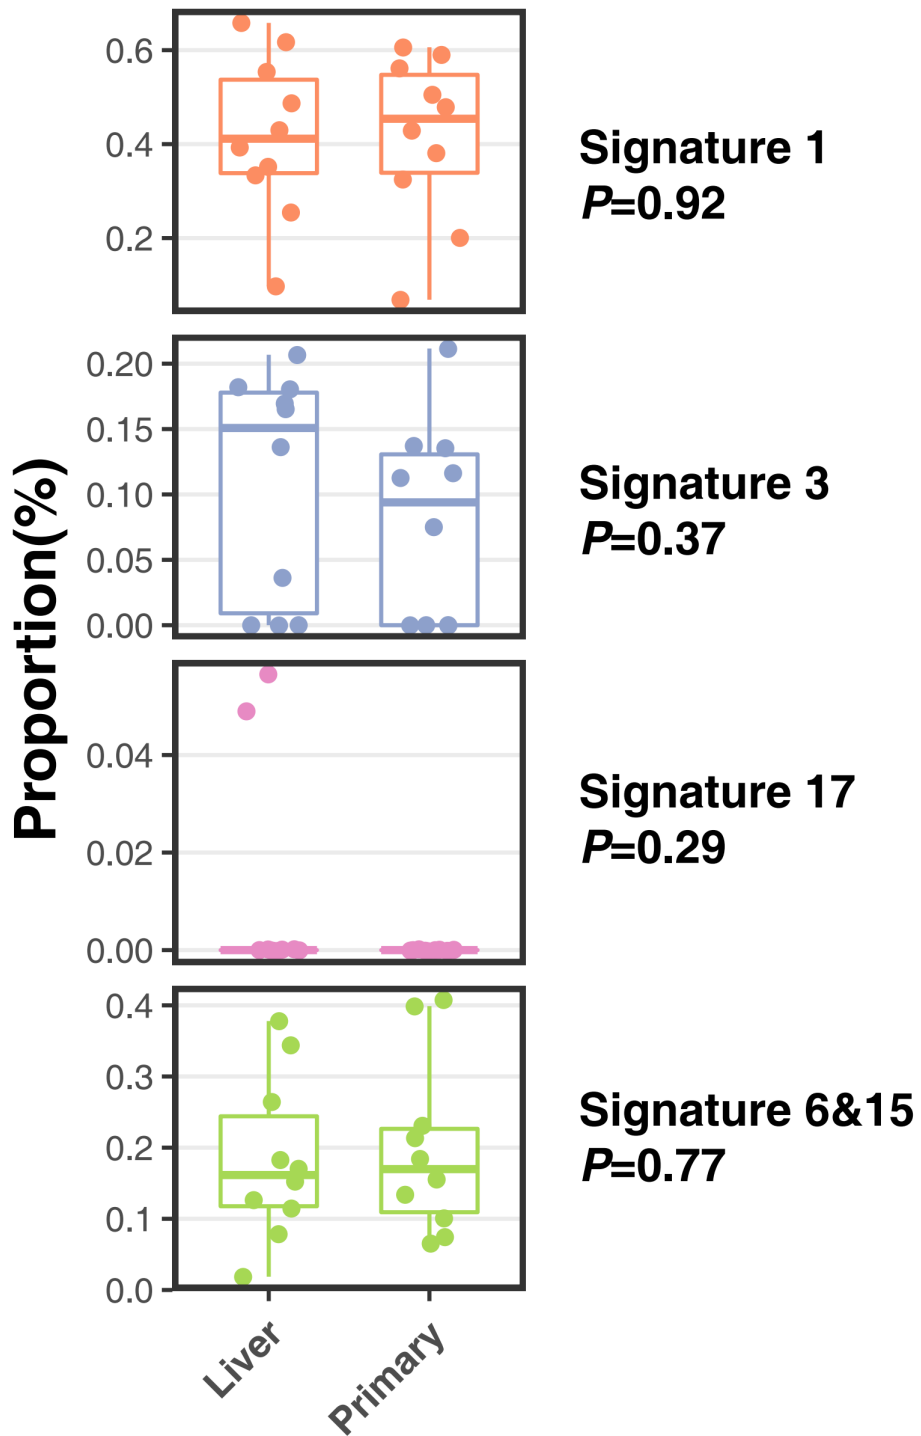

Supplementary Figure 6. Inferred phylogenetic tree of BM and matched primary samples from 7 “trios”. We first estimated the number of subclones of each samples and the relative contribution. Then phylogenetic model was inferred according to subclones estimated. For each sample, subclones are presented in different colors and the samples carried the subclones are presented next to the subclone number. \* indicates the founding clones of each samples. The founding mutations of brain metastasis and TP53 mutations are presented next to the initiated subclones.

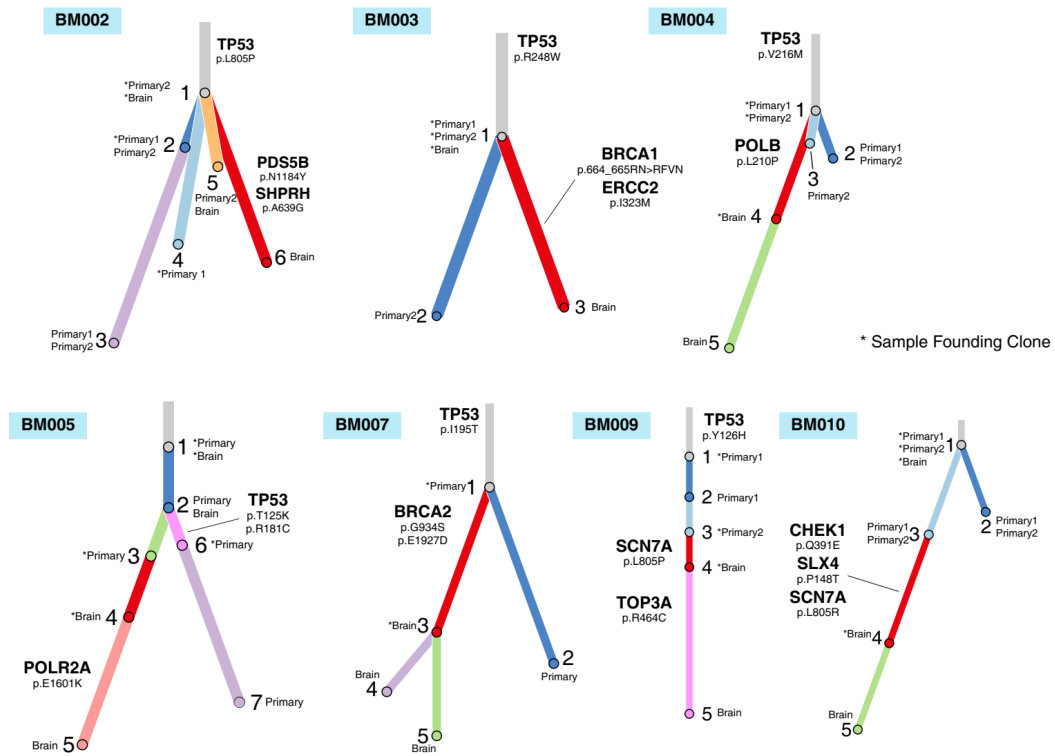

Supplementary Figure 7. Description of DDR mutations.

A. Mutational lollipop of brain-specific mutation in *BRCA1* for patient BM001. For each gene, the mutations of our study (up) and COSMIC (down) were presented as a circle with different colors according to their function annotation. The protein domains are presented according to Pfam databases (<https://pfam.xfam.org/>). The fractions of reads with alternative reads are presented to show the biallelic loss of the BRCA1 mutation.

B. Mutational lollipop of brain-specific mutation in *BRCA2* for patient BM007.

C. Proportion difference of Signature 3 between brain metastases and primary tissues from patients BM001, BM002, BM004, BM007, BM013, BM014, and BM018.



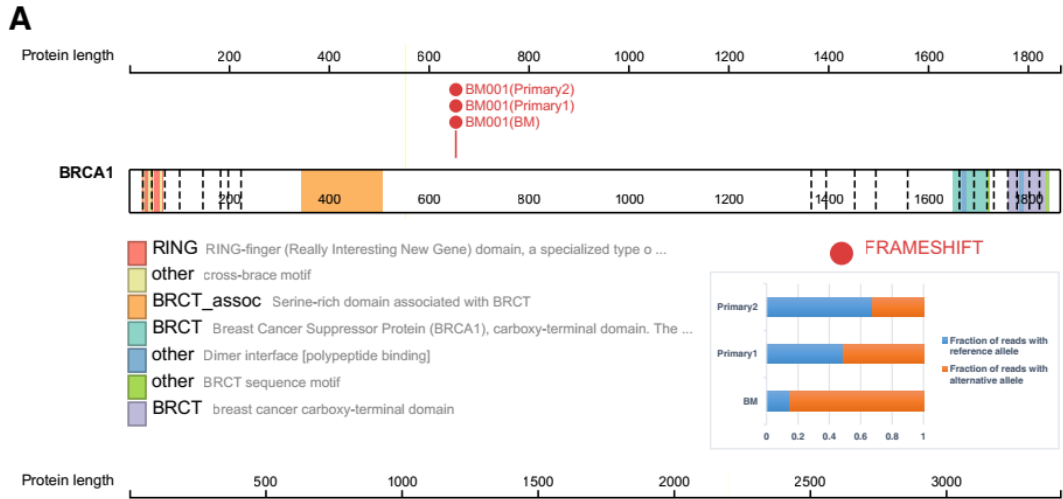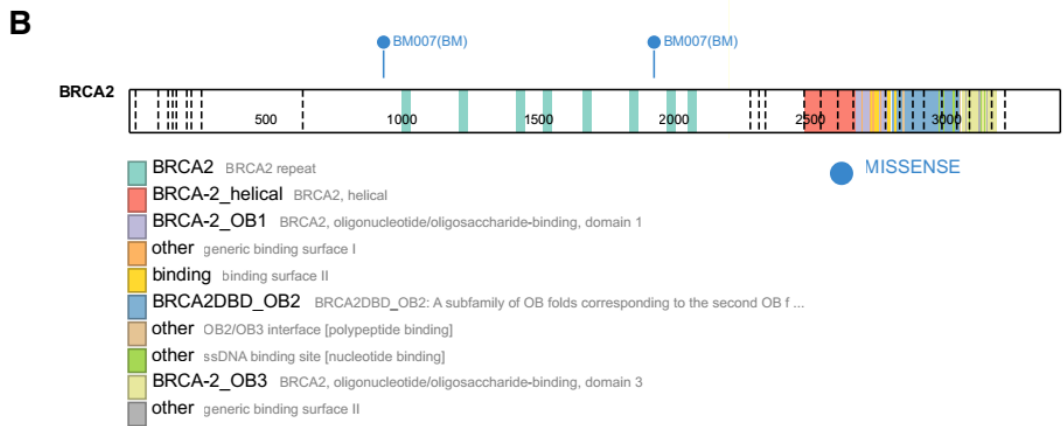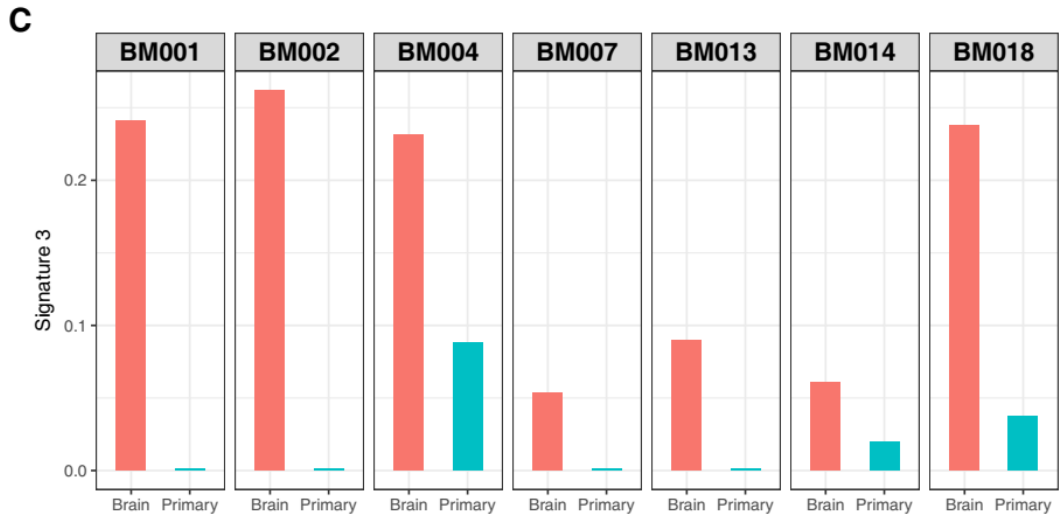

Supplementary Figure 8. Twenty-seven potential driver genes related to BM. In this analysis, we included TCGA patients after matching for age, sex and stage at diagnosis using nearest matching from MatchIt R package to avoid the influence of the covariates. In total, 152 TCGA patients corrected for age, sex and stage were used for mutation rate calculation. The results were similar to the mutation rates we provided in Figure 4A.

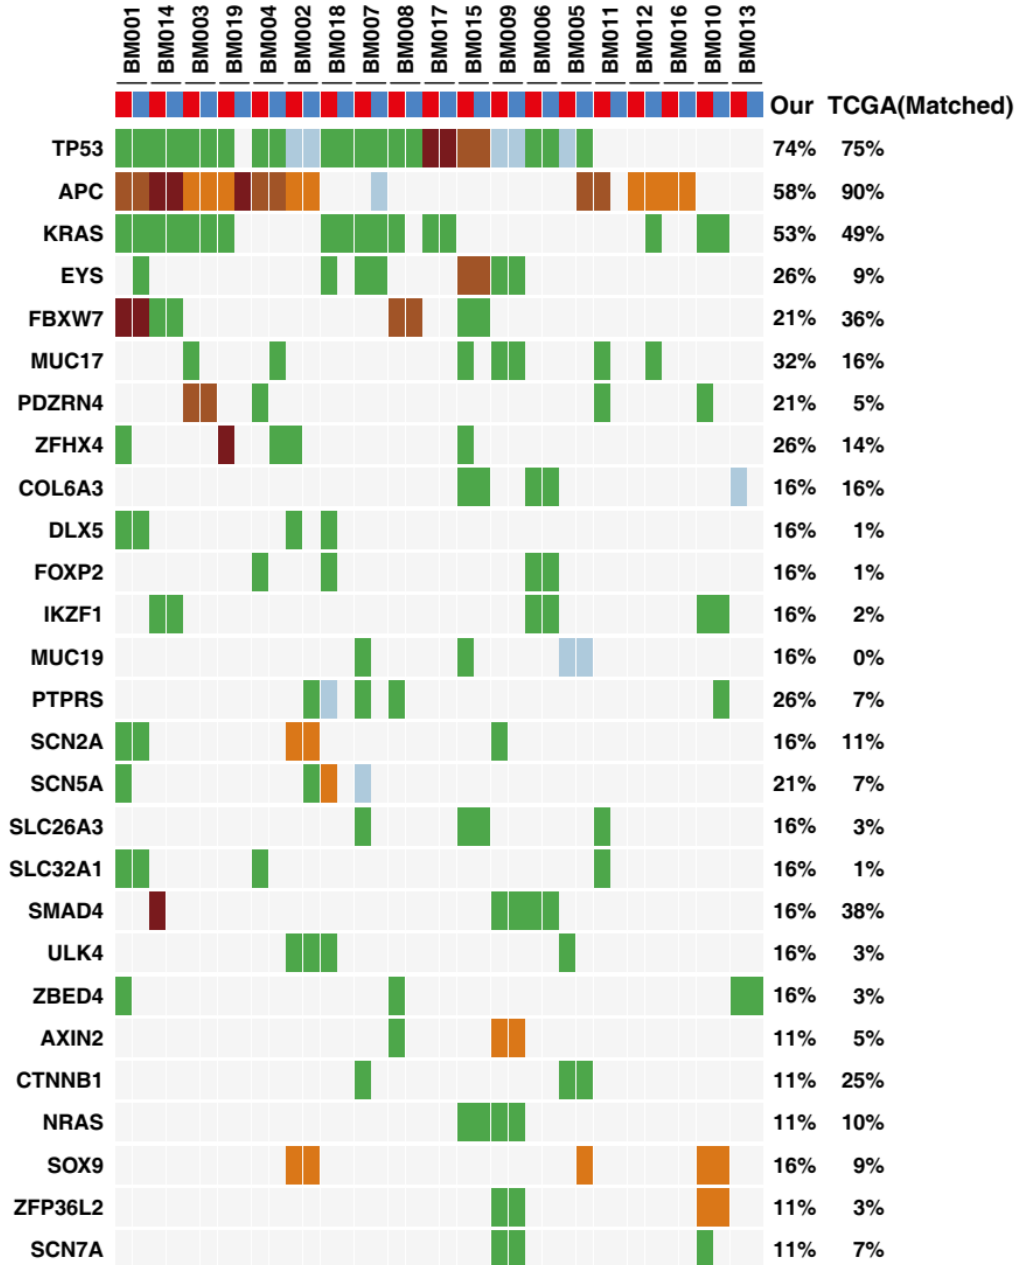

Supplementary Figure 9. A. *IKZF1* is down-regulated in TCGA CRC bulk tissues. B. *IKZF1* is highly expressed in 4.0% of CRC tumor cells and in none of the normal mucosa cells.

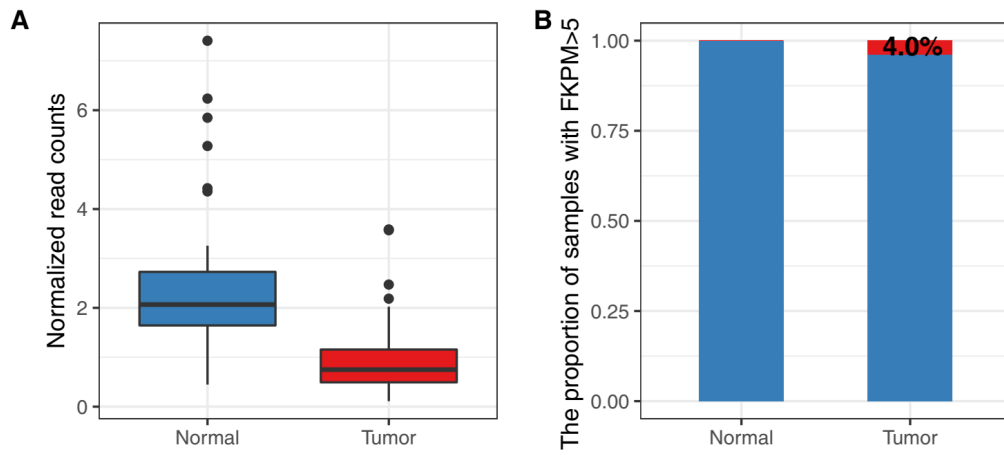





Supplementary Figure 12. Mutational lollipop of *PDZRN4* (A) and *SCN5A* (B). For each gene, the mutations of our study (up) and COSMIC (down) are presented as a circle with different colors according to their function annotation. The protein domains are presented according to Pfam databases (<https://pfam.xfam.org/>).

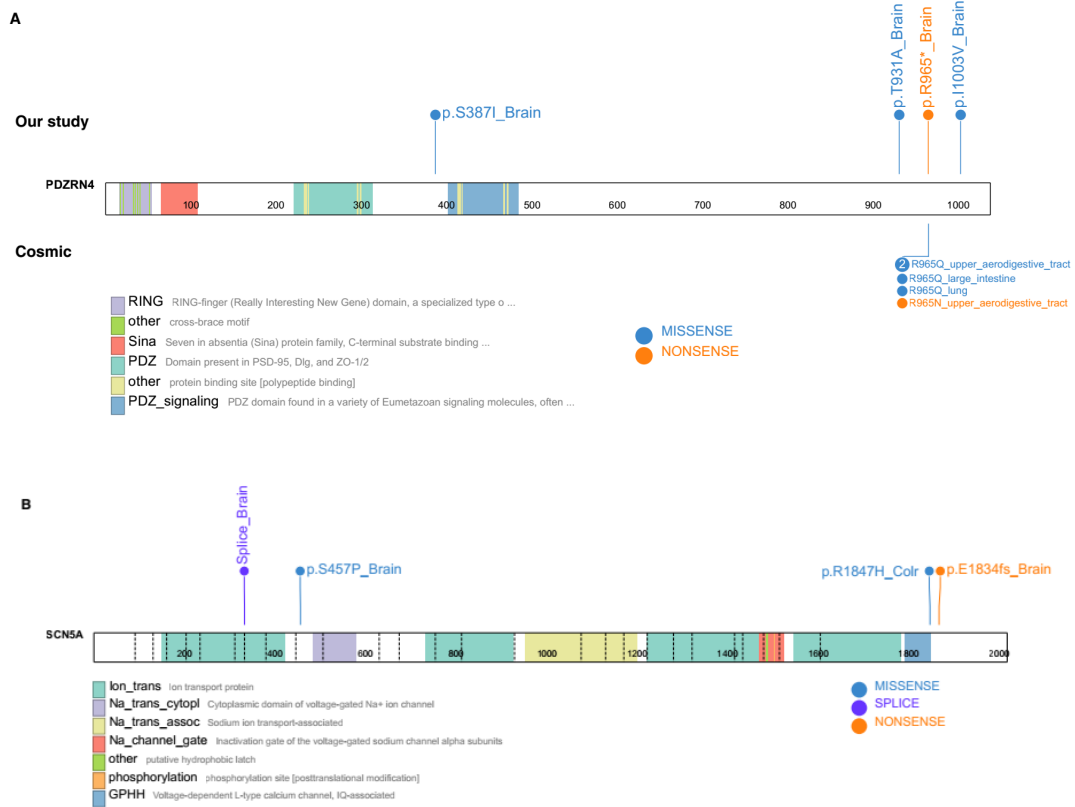

Supplementary Figure 13. Validation of brain metastases specific recurrent mutations in *SCN7A*. The results of sanger sequencing of brain metastasis (A), primary and normal samples (B) were presented.

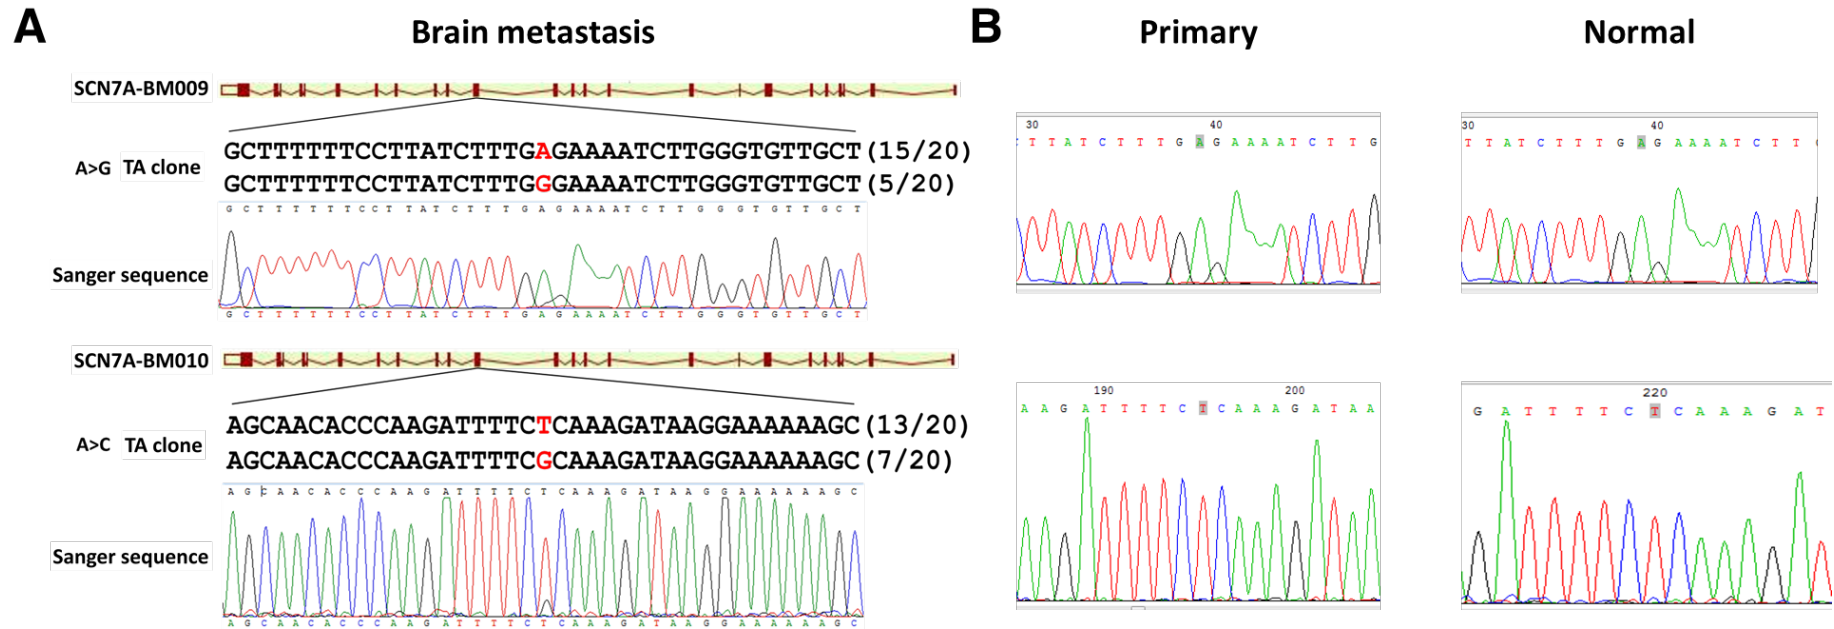

Supplementary Table 1. Summary of clinical information of 19 CRC patients with brain metastases and 5 CRC patients with liver metastases.

| ID    | Gender | Primary Site  | Age of Diagnosis | Brain Met Progression                                                                           | Age of Death | Metastasis sites                              | Radiation therapy          | Chemotherapy                      | Targeted therapy                  | Immunotherapy                          | Brain Resection         | Drinking history | Smoking history | Other metastases | Stage of diagnosis | Nodal involvement | Grade of primary tumor              | Vascular invasion | perineural invasion | Size of primary tumor at diagnosis (cm) | chemotherapy prior to brain surgery                                                             | AJCC Stage of primary tumor | Platform |
|-------|--------|---------------|------------------|-------------------------------------------------------------------------------------------------|--------------|-----------------------------------------------|----------------------------|-----------------------------------|-----------------------------------|----------------------------------------|-------------------------|------------------|-----------------|------------------|--------------------|-------------------|-------------------------------------|-------------------|---------------------|-----------------------------------------|-------------------------------------------------------------------------------------------------|-----------------------------|----------|
|       |        |               |                  | Free Survival in Years (Time between diagnosis of primary tumor and sequenced brain metastasis) |              | brain to met (0=no; 1=liver; 2=lung; 3.other) | met to brain (0=no; 1=yes) | brain to metastasis (0=no; 1=yes) | metastasis to brain (0=no; 1=yes) | metastasis to metastasis (0=no; 1=yes) | Resection (0=no; 1=yes) | (1=yes; 0=no)    | (1=yes; 0=no)   | (1=yes; 0=no)    | (TN Mstage)        | of primary tumor  |                                     | 1=yes; 0=no       | 1=yes; 0=no         |                                         | 1=Oxaliplatin; 2=Irinotecan; 3=Fluorouracil; 4=Bevacizumab; 5=Cetuximab; 6=Oral targeted drugs) |                             |          |
| BM001 | F      | rectum        | 65.1             | 3.75                                                                                            | 69.2         | 0                                             | 0                          | 1                                 | 0                                 | 0                                      | 0                       | 0                | 0               | 0                | T3N0M0             | 0/15              | Well differentiated                 | 0                 | 0                   | 1.5 × 1.4 × 0.8                         | 1,2,3                                                                                           | IIA                         | WES      |
| BM002 | F      | rectum        | 61.5             | 3.33                                                                                            | 66.4         | 2                                             | 1                          | 1                                 | 0                                 | 0                                      | 0                       | 0                | 1               | 1                | T3N2aM0            | 4/6               | Moderately to poorly differentiated | 1                 | 1                   | 3.2 × 3.5 × 0.6                         | 1,2,3                                                                                           | IIIB                        | WES      |
| BM010 | F      | colon (right) | 59               | 2.9                                                                                             | 63           | 0                                             | 0                          | 1                                 | 0                                 | 0                                      | 0                       | 0                | 0               | 0                | T3N0M0             | 0/18              | Moderately differentiated           | 0                 | 1                   | 3.5 × 2.5 × 0.5                         | 1,2,3                                                                                           | IIA                         | WES      |
| BM008 | M      | rectum        | 63               | 6.1                                                                                             | 69.9         | 2                                             | 1                          | 1                                 | 0                                 | 0                                      | 0                       | 0                | 1               | 1                | T3N1bM0            | 3/3               | Moderately differentiated           | 0                 | 0                   | 3.2 × 2.2 × 1.7                         | 1,2,3                                                                                           | IIIB                        | WES      |
| BM006 | F      | rectum        | 58.7             | 3.1                                                                                             | 63.5         | 1.2                                           | 1                          | 1                                 | 0                                 | 0                                      | 0                       | 0                | 0               | 1                | T3N0M0             | 0/3               | Moderately differentiated           | 0                 | 0                   | 6.6 × 4.8 × 3.7                         | 1,2,3                                                                                           | IIA                         | WES      |
| BM009 | M      | colon(right)  | 75.8             | 5.2                                                                                             | 81.5         | 2                                             | 0                          | 1                                 | 0                                 | 0                                      | 0                       | 0                | 1               | 0                | T3N0M0             | 0/38              | Moderately differentiated           | 0                 | 0                   | 9 × 9.2 × 7.1                           | 1,2,3                                                                                           | IIA                         | WES      |
| BM005 | M      | rectum        | 55.6             | 2.8                                                                                             | 59.4         | 2                                             | 1                          | 1                                 | 0                                 | 0                                      | 0                       | 1                | 1               | 0                | T3N2aM0            | 5/15              | Moderately to poorly differentiated | 1                 | 0                   | 5 × 4.2 × 2.1                           | 1,2,3                                                                                           | IIIB                        | WES      |
| BM007 | F      | rectum        | 40.1             | 3.8                                                                                             | 45.1         | 2                                             | 1                          | 1                                 | 0                                 | 0                                      | 0                       | 0                | 0               | 0                | T3N1aM0            | 1/4               | Moderately to well differentiated   | 0                 | 0                   | 3.3 × 2.2 × 2.1                         | 1,2,3                                                                                           | IIIB                        | WES      |
| BM003 | M      | rectum        | 38.3             | 0.5                                                                                             | 40.1         | 3                                             | 1                          | 1                                 | 0                                 | 0                                      | 0                       | 0                | 0               | 1                | T4aN2bM0           | 24/24             | Poorly differentiated               | 1                 | 1                   | 3.2 × 2 × 1.7                           | 1,2,3                                                                                           | IIIC                        | WES      |
| BM011 | F      | rectum        | 53.2             | 2.1                                                                                             | 56.3         | 3                                             | 0                          | 1                                 | 1                                 | 0                                      | 0                       | 0                | 0               | 0                | T4aN0M0            | 0/8               | Moderately to poorly differentiated | 0                 | 1                   | 2.5 × 2 × 1.5                           | 1,2,3,5                                                                                         | IIIB                        | WES      |
| BM004 | M      | colon(right)  | 63.5             | 2.5                                                                                             | 67.2         | 1.2                                           | 0                          | 1                                 | 0                                 | 0                                      | 0                       | 0                | 1               | 0                | T4aN1cM0           | 0/14              | Moderately to poorly differentiated | 0                 | 0                   | 10 × 6 × 2                              | 1,2,3                                                                                           | IIIB                        | WES      |
| BM012 | F      | colon(left)   | 56.5             | 1.5                                                                                             | 58.7         | 2.3                                           | 0                          | 1                                 | 0                                 | 0                                      | 0                       | 0                | 0               | 0                | T3N1cM0            | 0/8               | Moderately differentiated           | 0                 | 1                   | 2.5 × 2 × 2                             | 1,2,3                                                                                           | IIIB                        | WGS      |
| BM014 | M      | rectum        | 79.2             | 1.9                                                                                             | Alive        | 2                                             | 0                          | 1                                 | 1                                 | 0                                      | 0                       | 0                | 0               | 0                | T3N1M0             | 1/8               | Moderately to poorly differentiated | 1                 | 1                   | 3 × 2 × 0.6                             | 1,2,3,4                                                                                         | IIIB                        | WGS      |
| BM017 | M      | colon(right)  | 54.2             | 1.2                                                                                             | 57.9         | 2                                             | 0                          | 1                                 | 1                                 | 0                                      | 0                       | 1                | 0               | 0                | T2N0M0             | 0/19              | Moderately differentiated           | 0                 | 0                   | 1.5 × 1 × 1                             | 1,2,3,4                                                                                         | IA                          | WGS      |
| BM019 | M      | rectum        | 56.3             | 2.8                                                                                             | 60.8         | 2                                             | 1                          | 1                                 | 0                                 | 0                                      | 0                       | 1                | 1               | 0                | T2N0M0             | 0/12              | Moderately differentiated           | 0                 | 0                   | 2.6 × 2.5 × 1                           | 1,2,3                                                                                           | IA                          | WGS      |
| BM016 | F      | rectum        | 54.7             | 0.6                                                                                             | 55.5         | 2                                             | 0                          | 1                                 | 0                                 | 0                                      | 0                       | 0                | 0               | 0                | T3N2bM0            | 7/8               | Moderately differentiated           | 1                 | 1                   | 5 × 3.4 × 3.1                           | 1,2,3                                                                                           | IIIC                        | WGS      |
| BM018 | M      | rectum        | 47.2             | 6.8                                                                                             | 54.9         | 2                                             | 1                          | 1                                 | 1                                 | 0                                      | 0                       | 1                | 1               | 0                | T3N1bM0            | 2/8               | Moderately differentiated           | 0                 | 0                   | 5 × 4.5 × 1.5                           | 1,2,3,4                                                                                         | IIIB                        | WGS      |
| BM015 | M      | rectum        | 55.1             | 1.2                                                                                             | Alive        | 2.3                                           | 0                          | 1                                 | 1                                 | 0                                      | 0                       | 1                | 1               | 0                | T4aN2bM0           | 2/8               | Moderately to poorly differentiated | 1                 | 0                   | 6 × 4 × 1                               | 1,2,3,4,6                                                                                       | IIIC                        | WGS      |
| BM013 | M      | rectum        | 51.2             | 4.1                                                                                             | 56.7         | 2                                             | 1                          | 1                                 | 0                                 | 0                                      | 0                       | 1                | 0               | 0                | T3N1bM0            | 1/8               | Moderately differentiated           | 1                 | 0                   | 5.2 × 3.5 × 1.2                         | 1,2,3                                                                                           | IIIB                        | WGS      |
| BM020 | F      | colon(right)  | 78.6             | 2.3                                                                                             | 81.5         | 3                                             | 0                          | 1                                 | 1                                 | 0                                      | 0                       | 0                | 0               | 0                | T3N2aM0            | 5/25              | Moderately to poorly differentiated | 1                 | 1                   | 6 × 5.5 × 1.4                           | 1,2,3,4                                                                                         | IIIB                        | RNA-Seq  |
| BM021 | M      | rectum        | 60.1             | 1.5                                                                                             | Alive        | 2                                             | 1                          | 1                                 | 0                                 | 0                                      | 0                       | 1                | 1               | 0                | T3N1M0             | 1/25              | Moderately differentiated           | 0                 | 0                   | 6 × 3.4 × 1.1                           | 1,2,3                                                                                           | IIIB                        | RNA-Seq  |
| LM001 | M      | colon(left)   | 63.2             | /                                                                                               | Alive        | /                                             | 0                          | 1                                 | 1                                 | 0                                      | /                       | 1                | 1               | /                | T3N2aM1a           | 2/8               | Moderately to poorly differentiated | 1                 | 0                   | 4 × 3 × 2                               | 1,2,3                                                                                           | IV                          | WES      |
| LM002 | F      | rectum        | 65.1             | /                                                                                               | Alive        | /                                             | 1                          | 1                                 | 1                                 | 0                                      | /                       | 0                | 0               | /                | T3N2bM1a           | 3/8               | Moderately to poorly differentiated | 0                 | 1                   | 5.5 × 4.5 × 0.8                         | 1,2,3                                                                                           | IV                          | WES      |
| LM003 | M      | colon(left)   | 58.5             | /                                                                                               | Alive        | /                                             | 0                          | 1                                 | 0                                 | 0                                      | /                       | 1                | 1               | /                | T4aN2aM1a          | 2/8               | Moderately differentiated           | 0                 | 1                   | 2.5 × 2.2 × 0.8                         | 1,2,3                                                                                           | IV                          | WES      |
| LM004 | F      | colon(left)   | 75.2             | /                                                                                               | Alive        | /                                             | 0                          | 1                                 | 0                                 | 0                                      | /                       | 0                | 0               | /                | T4aN1bM1a          | 1/8               | Moderately to poorly differentiated | 0                 | 1                   | 4 × 3 × 2.5                             | 1,2,3                                                                                           | IV                          | WES      |
| LM005 | M      | colon(left)   | 69.8             | /                                                                                               | Alive        | /                                             | 0                          | 1                                 | 0                                 | 0                                      | /                       | 1                | 1               | /                | T3N0M1a            | 0/13              | Moderately differentiated           | 0                 | 1                   | 4 × 2.5 × 0.5                           | 1,2,3                                                                                           | IV                          | WES      |



Supplementary Table 2. Mutation number and purity in all Brain metastasis patients.

| ID    | Group   | purity | Mutation Number | Mutation rate (/MB) |
|-------|---------|--------|-----------------|---------------------|
| BM001 | Brain   | 0.88   | 349             | 2.97                |
| BM001 | Primary | 1      | 446             | 3.45                |
| BM001 | Primary | 0.69   | 269             | 2.74                |
| BM008 | Brain   | 1      | 376             | 3.48                |
| BM008 | Primary | 1      | 473             | 4.44                |
| BM008 | Primary | 1      | 95              | 0.78                |
| BM009 | Brain   | 0.5    | 472             | 4.32                |
| BM009 | Primary | 0.81   | 343             | 2.99                |
| BM009 | Primary | 0.8    | 434             | 4.79                |
| BM003 | Brain   | 0.89   | 259             | 2.34                |
| BM003 | Primary | 0.45   | 235             | 2.01                |
| BM003 | Primary | 0.46   | 159             | 1.30                |
| BM011 | Brain   | 0.81   | 261             | 2.29                |
| BM011 | Primary | 0.43   | 86              | 0.68                |
| BM010 | Brain   | 0.56   | 473             | 3.97                |
| BM010 | Primary | 0.82   | 384             | 3.33                |
| BM010 | Primary | 0.75   | 398             | 3.56                |
| BM007 | Brain   | 0.84   | 371             | 3.23                |
| BM007 | Primary | 0.53   | 225             | 2.00                |
| BM006 | Brain   | 0.79   | 345             | 2.98                |
| BM006 | Primary | 0.57   | 267             | 2.31                |
| BM006 | Primary | 0.66   | 245             | 2.14                |
| BM004 | Brain   | 0.97   | 295             | 2.42                |
| BM004 | Primary | 0.46   | 197             | 1.92                |
| BM004 | Primary | 0.9    | 262             | 2.43                |
| BM002 | Brain   | 0.69   | 308             | 2.56                |
| BM002 | Primary | 0.33   | 362             | 3.06                |
| BM002 | Primary | 0.37   | 268             | 2.36                |
| BM005 | Brain   | 0.73   | 193             | 1.69                |
| BM005 | Primary | 0.79   | 253             | 2.21                |
| BM005 | Primary | 0.6    | 212             | 1.84                |
| BM012 | Brain   | 0.85   | 9460            | 3.34                |
| BM012 | Primary | 0.73   | 13083           | 4.65                |
| BM013 | Brain   | 0.92   | 21900           | 7.79                |
| BM013 | Primary | 0.23   | 28238           | 11.37               |
| BM014 | Brain   | 0.74   | 13934           | 4.91                |
| BM014 | Primary | 0.5    | 10549           | 3.71                |
| BM015 | Brain   | 0.84   | 33312           | 11.81               |
| BM015 | Primary | 0.5    | 18276           | 6.45                |
| BM016 | Brain   | 0.75   | 9330            | 3.30                |
| BM016 | Primary | 0.14   | 7457            | 2.63                |

---

|       |         |      |       |       |
|-------|---------|------|-------|-------|
| BM017 | Brain   | 0.89 | 20072 | 7.09  |
| BM017 | Primary | 0.11 | 11389 | 4.01  |
| BM018 | Brain   | 0.31 | 33843 | 11.95 |
| BM018 | Primary | 0.17 | 12445 | 4.47  |
| BM019 | Brain   | 0.94 | 15526 | 5.95  |
| BM019 | Primary | 0.15 | 18803 | 6.69  |

---

Supplementary Table 3. The mean proportion of 30 COSMIC signatures in metastasis CRC (WES), metastasis CRC (WGS) and TCGA patients

| Cosmic Signatures | Metastasis CRC (WES) |         | Metastasis CRC (WGS) |         | TCGA CRC |      |
|-------------------|----------------------|---------|----------------------|---------|----------|------|
|                   | Brain                | Primary | Brain                | Primary | MSI      | MSS  |
| Signature 1       | 0.42                 | 0.76    | 0.26                 | 0.35    | 0.33     | 0.47 |
| Signature 3       | 0.13                 | 0.04    | 0.07                 | 0.02    | 0.00     | 0.01 |
| Signature 17      | 0.12                 | 0.02    | 0.21                 | 0.03    | 0.00     | 0.01 |
| Signature 6       | 0.10                 | 0.03    | 0.02                 | 0.03    | 0.44     | 0.05 |
| Signature 18      | 0.04                 | 0.02    | 0.06                 | 0.07    | 0.00     | 0.02 |
| Signature 15      | 0.03                 | 0.02    | 0.02                 | 0.01    | 0.09     | 0.03 |
| Signature 4       | 0.02                 | 0.01    | 0.00                 | 0.00    | 0.00     | 0.01 |
| Signature 13      | 0.02                 | 0.01    | 0.00                 | 0.00    | 0.00     | 0.00 |
| Signature 24      | 0.02                 | 0.00    | 0.00                 | 0.00    | 0.00     | 0.01 |
| Signature 25      | 0.01                 | 0.00    | 0.00                 | 0.02    | 0.00     | 0.00 |
| Signature 28      | 0.01                 | 0.01    | 0.01                 | 0.00    | 0.00     | 0.00 |
| Signature 2       | 0.01                 | 0.01    | 0.01                 | 0.03    | 0.00     | 0.00 |
| Signature 7       | 0.01                 | 0.02    | 0.00                 | 0.01    | 0.00     | 0.01 |
| Signature 8       | 0.01                 | 0.00    | 0.13                 | 0.17    | 0.00     | 0.00 |
| Signature 29      | 0.01                 | 0.00    | 0.00                 | 0.00    | 0.00     | 0.00 |
| Signature 10      | 0.01                 | 0.01    | 0.01                 | 0.01    | 0.00     | 0.03 |
| Signature 11      | 0.01                 | 0.01    | 0.00                 | 0.01    | 0.00     | 0.00 |
| Signature 19      | 0.01                 | 0.01    | 0.00                 | 0.00    | 0.00     | 0.00 |
| Signature 22      | 0.01                 | 0.00    | 0.00                 | 0.00    | 0.00     | 0.00 |
| Signature 21      | 0.00                 | 0.00    | 0.00                 | 0.00    | 0.01     | 0.01 |
| Signature 20      | 0.00                 | 0.00    | 0.00                 | 0.00    | 0.01     | 0.03 |
| Signature 23      | 0.00                 | 0.00    | 0.00                 | 0.00    | 0.00     | 0.00 |
| Signature 9       | 0.00                 | 0.00    | 0.14                 | 0.09    | 0.00     | 0.00 |
| Signature 27      | 0.00                 | 0.01    | 0.01                 | 0.05    | 0.00     | 0.00 |
| Signature 5       | 0.00                 | 0.00    | 0.02                 | 0.06    | 0.00     | 0.00 |
| Signature 12      | 0.00                 | 0.00    | 0.01                 | 0.03    | 0.04     | 0.27 |
| Signature 14      | 0.00                 | 0.00    | 0.00                 | 0.00    | 0.00     | 0.00 |
| Signature 16      | 0.00                 | 0.00    | 0.00                 | 0.01    | 0.00     | 0.00 |
| Signature 26      | 0.00                 | 0.00    | 0.00                 | 0.00    | 0.05     | 0.00 |
| Signature 30      | 0.00                 | 0.00    | 0.00                 | 0.00    | 0.00     | 0.00 |
